# Supplementary material for: Sensitivity analysis of DSD retrievals from polarimetric radar in stratiform rain based on the μ –Λ relationship
Source: Copernicus journal article supplement (doi:10.5194/amt-15-4951-2022), 2022-08-30
Supplement: Supplementary file 1 [file amt-15-4951-2022-supplement.zip]

Archive with 7 entries (7 files):
- 20141024.nc
- 20141103.nc
- 20141015.nc
- 20141008.nc
- amt-15-4951-2022-supplement-title-page.pdf
- 20141016.nc
- 20141011.nc
