# Supplementary material for: Sensitivity analysis of DSD retrievals from polarimetric radar in stratiform rain based on the μ –Λ relationship
Source: Copernicus journal article supplement (doi:10.5194/amt-15-4951-2022), 2022-08-30
Supplement: Supplementary file 1 [file amt-15-4951-2022-supplement.zip › amt-15-4951-2022-supplement-title-page.pdf]

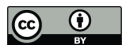

## *Supplement of*

# **Sensitivity analysis of DSD retrievals from polarimetric radar in stratiform rain based on the $\mu$ – $\Lambda$ relationship**

**Christos Gatidis et al.**

*Correspondence to:* Christos Gatidis ([c.gatidis@tudelft.nl](mailto:c.gatidis@tudelft.nl))

- [amt-15-4951-2022-supplement-title-page.pdf](#)
- [20141008.nc](#)
- [20141011.nc](#)
- [20141015.nc](#)
- [20141016.nc](#)
- [20141024.nc](#)
- [20141103.nc](#)

The copyright of individual parts of the supplement might differ from the article licence.
